# Supplementary material
Source: MDPI journal article supplement (https://www.mdpi.com/2072-4292/10/11/1673)
Supplement: s1 [file s1]

Supplementary Material

# Potential and Limitations of Open Satellite Data for Flood Mapping

Davide Notti<sup>1</sup>, Daniele Giordan<sup>1</sup>, Fabiana Caló<sup>2</sup>, Francesco Zucca<sup>3</sup>, Jorge P. Galve<sup>4</sup>

<sup>1</sup> National Research Council of Italy, Research Institute for Geo-Hydrological Protection (CNR-IRPI), Torino, Italy; [davide.notti@irpi.cnr.it](mailto:davide.notti@irpi.cnr.it), [daniele.giordan@irpi.cnr.it](mailto:daniele.giordan@irpi.cnr.it)

<sup>2</sup> National Research Council (CNR) of Italy – Institute for the Electromagnetic Sensing of the Environment (IREA), via Diocleziano 328, 80124 Napoli, Italy; [calo.f@irea.cnr.it](mailto:calo.f@irea.cnr.it), [pepe.a@irea.cnr.it](mailto:pepe.a@irea.cnr.it)

<sup>3</sup> Università di Pavia, Italy; [francesco.zucca@unipv.it](mailto:francesco.zucca@unipv.it)

<sup>4</sup> Departamento de Geodinámica, Universidad de Granada, Spain; [jpgalve@ugr.es](mailto:jpgalve@ugr.es)

Received: date; Accepted: date; Published: date

## Supplementary material – Satellite Dataset used for this study

In the following tables and figures are reported:

- The bounding box coordinates (WGS 84 decimal degree) for each study area used to search satellite data (table 1);
- The list of satellite acquisition date divided for satellite sensors and location (Tables 2 – 6);
- Some representative pre- and co/post flood images for each satellite used and dived for study areas (Figs. 1-4);

**Table 1.** Bounding box coordinates for satellite images search

| Study area           | Co-Flood date | NW Corner         | SE Corner         | Sample figure |
|----------------------|---------------|-------------------|-------------------|---------------|
| Tanaro (Alessandria) | 25-26/11/2016 | 45.01° N; 8.38° E | 44.08° N; 8.76° E | Fig. 1        |
| Po (South Turin)     | 25/11/2016    | 45.01° N; 7.54° E | 44.08° N; 7.73° E | Fig. 2        |
| Ebro (Zaragoza)      | 01-05/03/2015 | 41.85° N; 1.20° W | 41.20° N; 0.46° W | Fig. 3        |
| Arahal               | 29/11/2017    | 37.31° N; 5.74° W | 37.16° N; 5.50° W | Fig. 4        |

**Table 2.** List of LANDSAT-8 images. <https://earthexplorer.usgs.gov/> (last-access 29/08/2018)

| Ebro (Zaragoza)  |             |
|------------------|-------------|
| Acquisition date | flood stage |
| 29/12/2014       | pre-flood   |
| 03/03/2015       | co-flood    |
| 04/04/2015       | post-flood  |
| Arahal           |             |
| Acquisition date | flood stage |
| 17/11/2017       | pre-flood   |
| 03/12/2017       | post-flood  |

**Table 3.** List of MODIS Terra/Aqua images. <https://ladsweb.modaps.eosdis.nasa.gov/> (500 m SR data); SCP plug-in for QGIS (for 250 m SR data) (last-access 29/08/2018)

| Tanaro (Alessandria) and Po (South Turin) |                  |
|-------------------------------------------|------------------|
| Acquisition date                          | flood stage      |
| 12/11/2016                                | pre-flood        |
| 26/11/2016                                | partial co-flood |
| 30/11/2016                                | post-flood       |

| <b>Ebro (Zaragoza)</b> |                        |
|------------------------|------------------------|
| Acquisition date       | flood stage            |
| 25/01/2015             | pre-flood              |
| 05/02/2015             | co-flood (minor flood) |
| 19/02/2015             | co-flood (minor flood) |
| 02/03/2015             | co-flood (major flood) |
| 05/03/2015             | partial-co-flood       |
| 16/03/2015             | post-flood             |
| 27/03/2015             | co-flood (minor flood) |

**Table 4.** List of Sentinel-2 images - <https://scihub.copernicus.eu/dhus/#/home> (last-access 29/08/2018)

| <b>Tanaro (Alessandria) and Po (South Turin)</b> |                                 |
|--------------------------------------------------|---------------------------------|
| Acquisition date                                 | flood stage                     |
| 8/11/2016                                        | pre-flood                       |
| 01/12/2016                                       | post-flood for South Turin area |
| 08/12/2016                                       | post-flood for Alessandria area |
| <b>Arahal flood</b>                              |                                 |
| Acquisition date                                 | flood stage                     |
| 18/11/2017                                       | pre-flood                       |
| 08/12/2017                                       | post-flood                      |

**Table 5.** List of Sentinel-1 images <https://scihub.copernicus.eu/dhus/#/home> (last-access 29/08/2018)

| <b>Ebro (Zaragoza)</b>                           |                                                |
|--------------------------------------------------|------------------------------------------------|
| Acquisition date                                 | flood stage                                    |
| 09/02/2015 18:02 UTC                             | pre-flood (ascending geometry, SLC format)     |
| 05/03/2015 18:02 UTC                             | co-flood (ascending geometry, SLC format)      |
| <b>Tanaro (Alessandria) and Po (South Turin)</b> |                                                |
| Acquisition date                                 | flood stage                                    |
| 22/11/2016 05:35 UTC                             | pre-flood (descending geometry, SLC format)    |
| 28/11/2016 05:35 UTC                             | post-flood (descending geometry, SLC format)   |
| <b>Arahal</b>                                    |                                                |
| Acquisition date                                 | flood stage                                    |
| 23/11/2017 06:27 UTC                             | pre-flood (ascending geometry, SLC)            |
| 29/11/2017 06:27 UTC                             | near co-flood (ascending geometry, SLC format) |

**Table 6.** List of Proba-V images <http://www.vito-eodata.be/PDF/portal/Application.html#Home> (last-access 29/08/2018)

| <b>Ebro (Zaragoza)</b>                           |             |
|--------------------------------------------------|-------------|
| Acquisition date                                 | flood stage |
| 25/01/2015                                       | pre flood   |
| 01/03/2015                                       | co-flood    |
| 06/06/2015                                       | post-flood  |
| <b>Tanaro (Alessandria) and Po (South Turin)</b> |             |
| Acquisition date                                 | flood stage |
| 06/11/2016                                       | Pre-flood   |
| 26/11/2016                                       | Co-flood    |
| 01/12/2016                                       | Post-flood  |

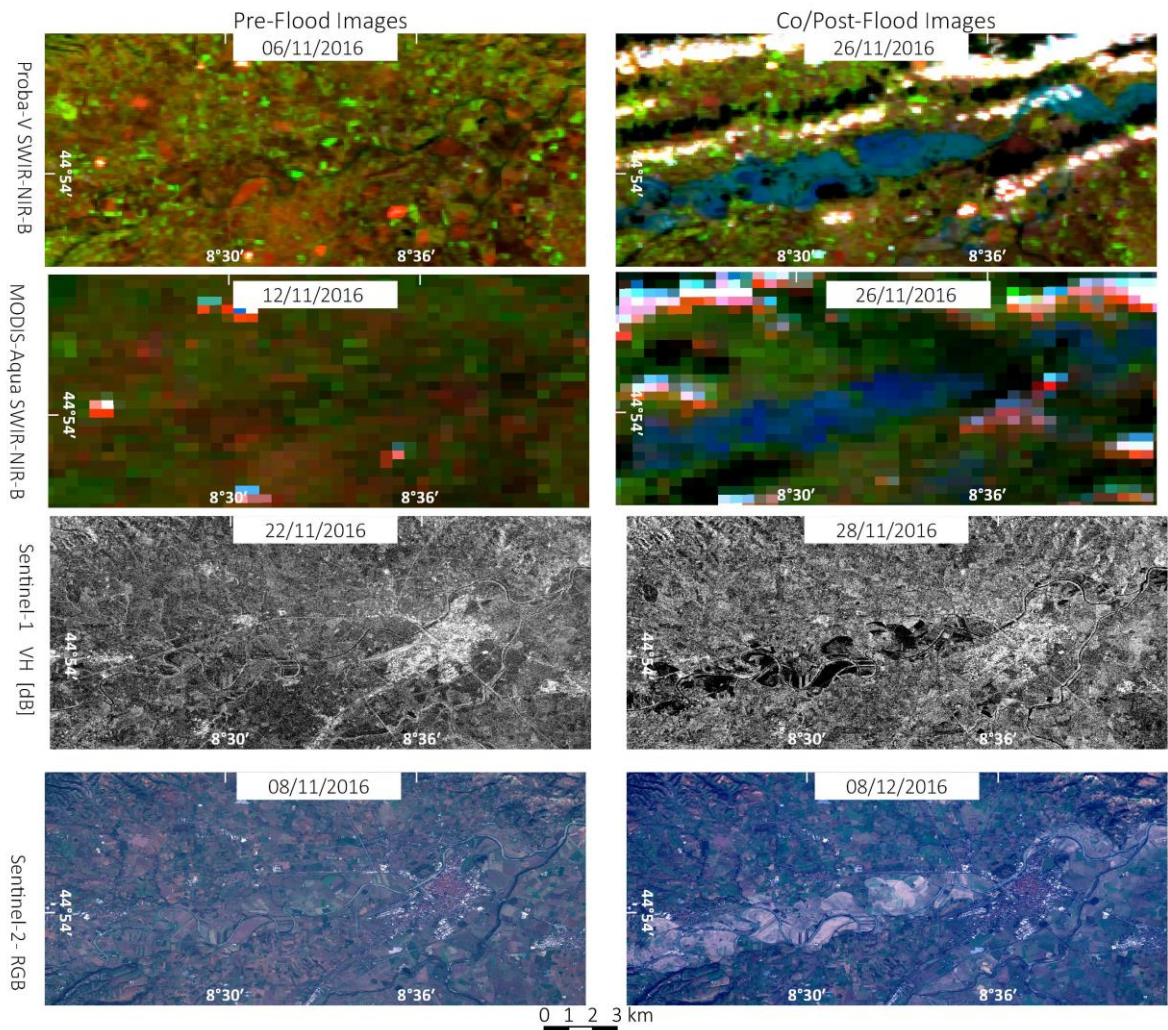

Figure 1. A sampling of satellite images used for Alessandria area



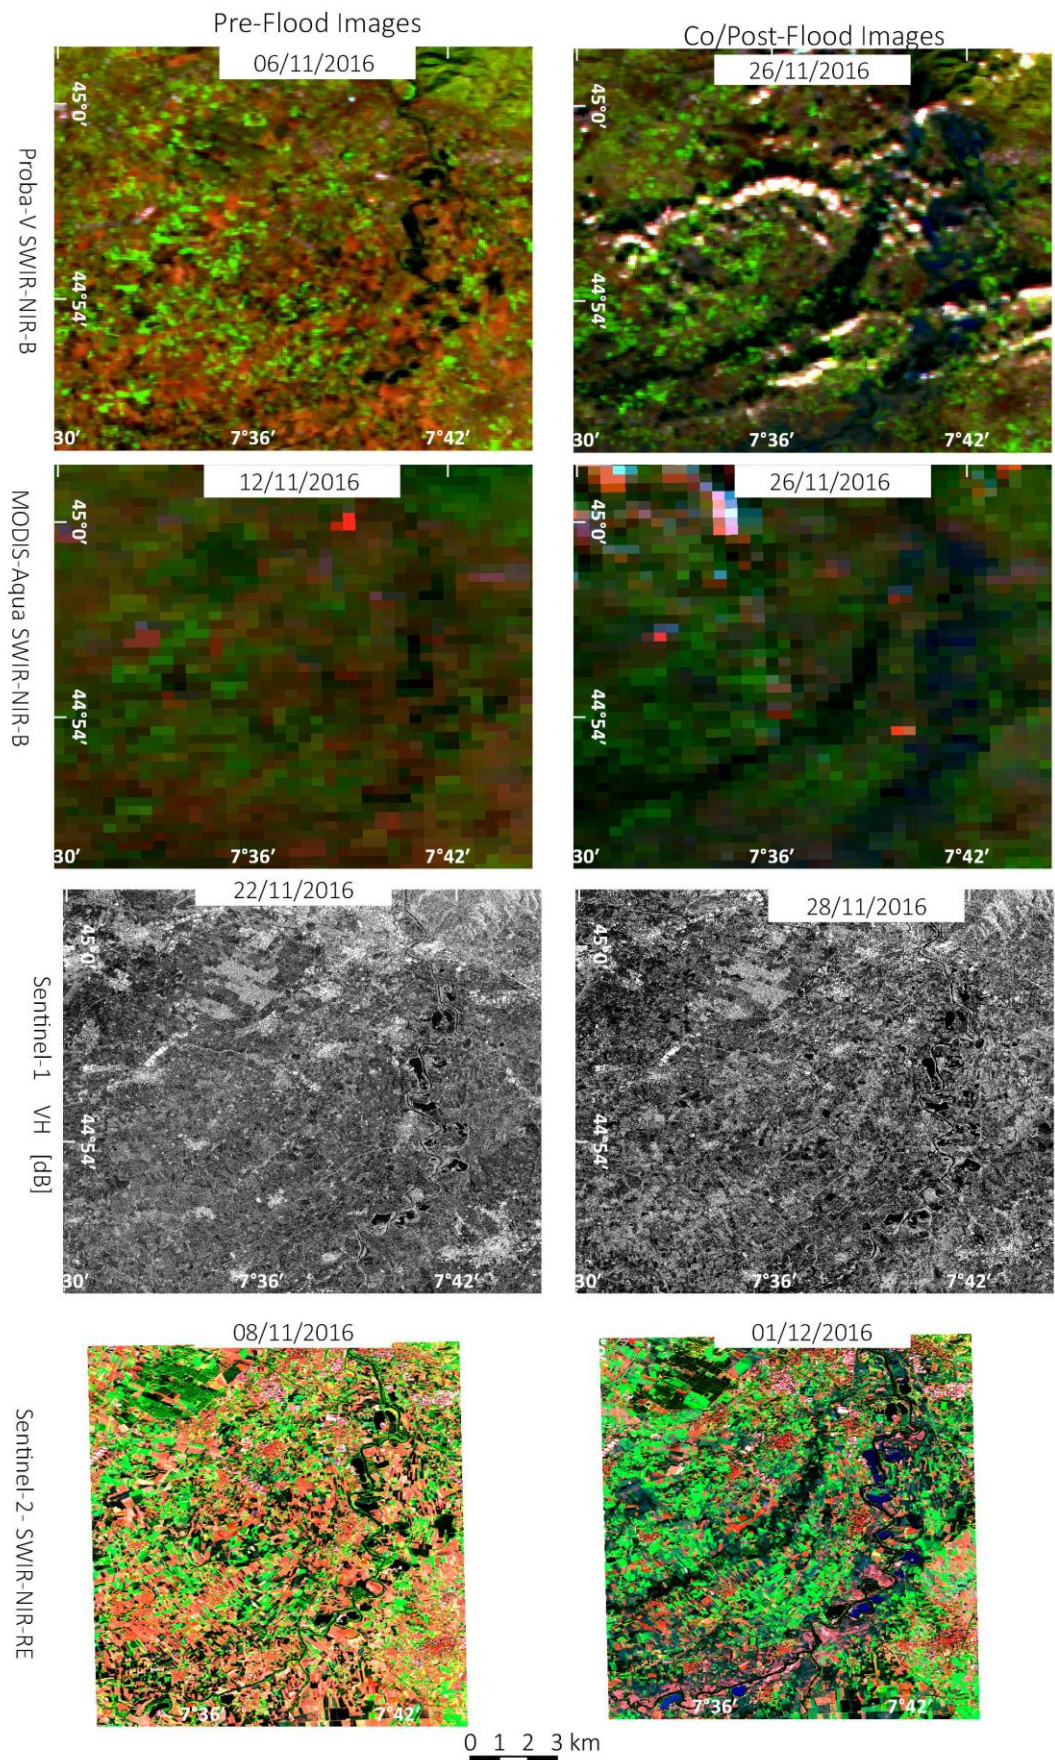

Figure 2. A sampling of satellite images used for South Turin area



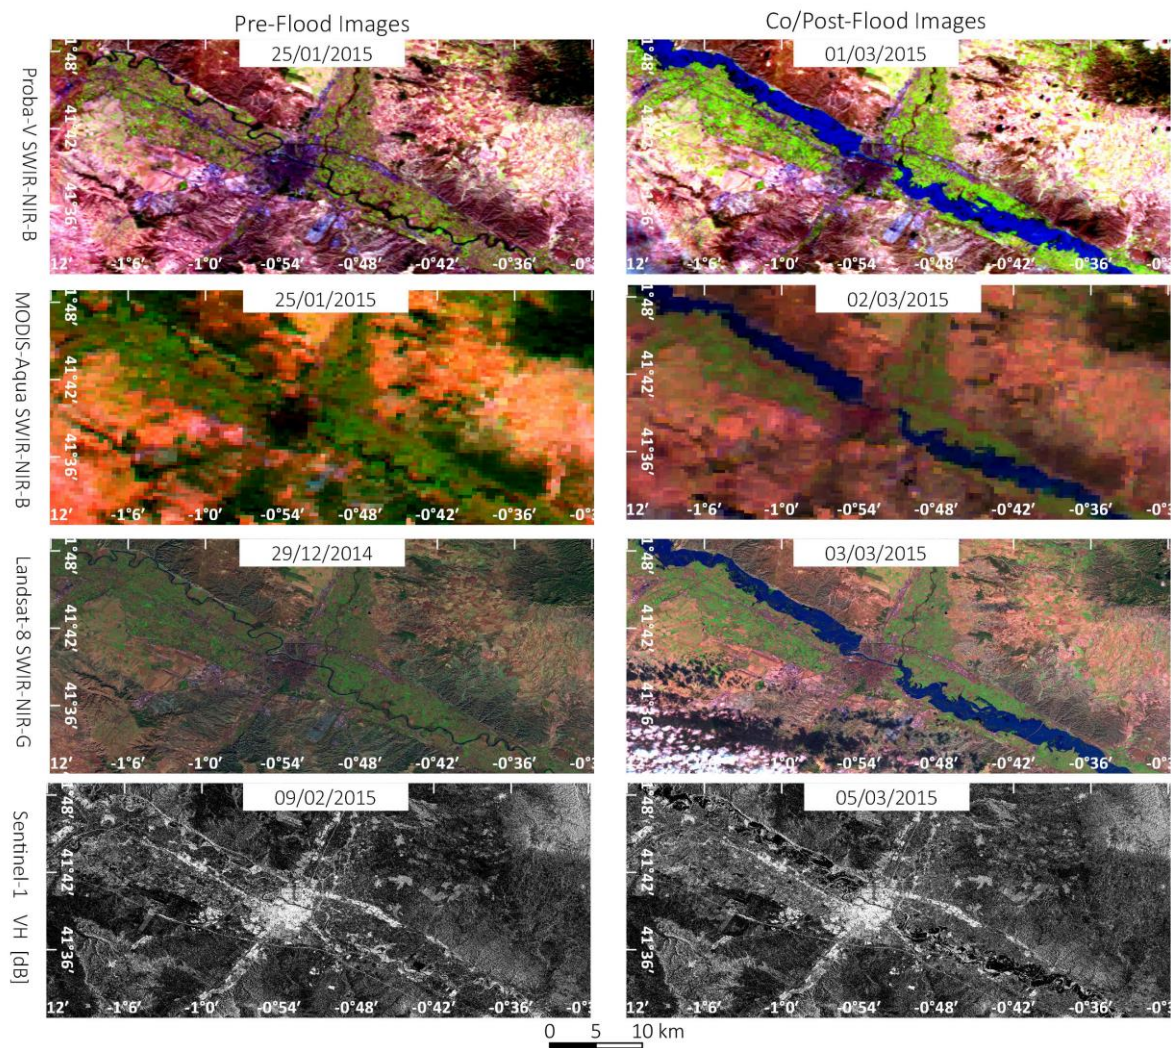

Figure 3. A sampling of satellite images used for Zaragoza area



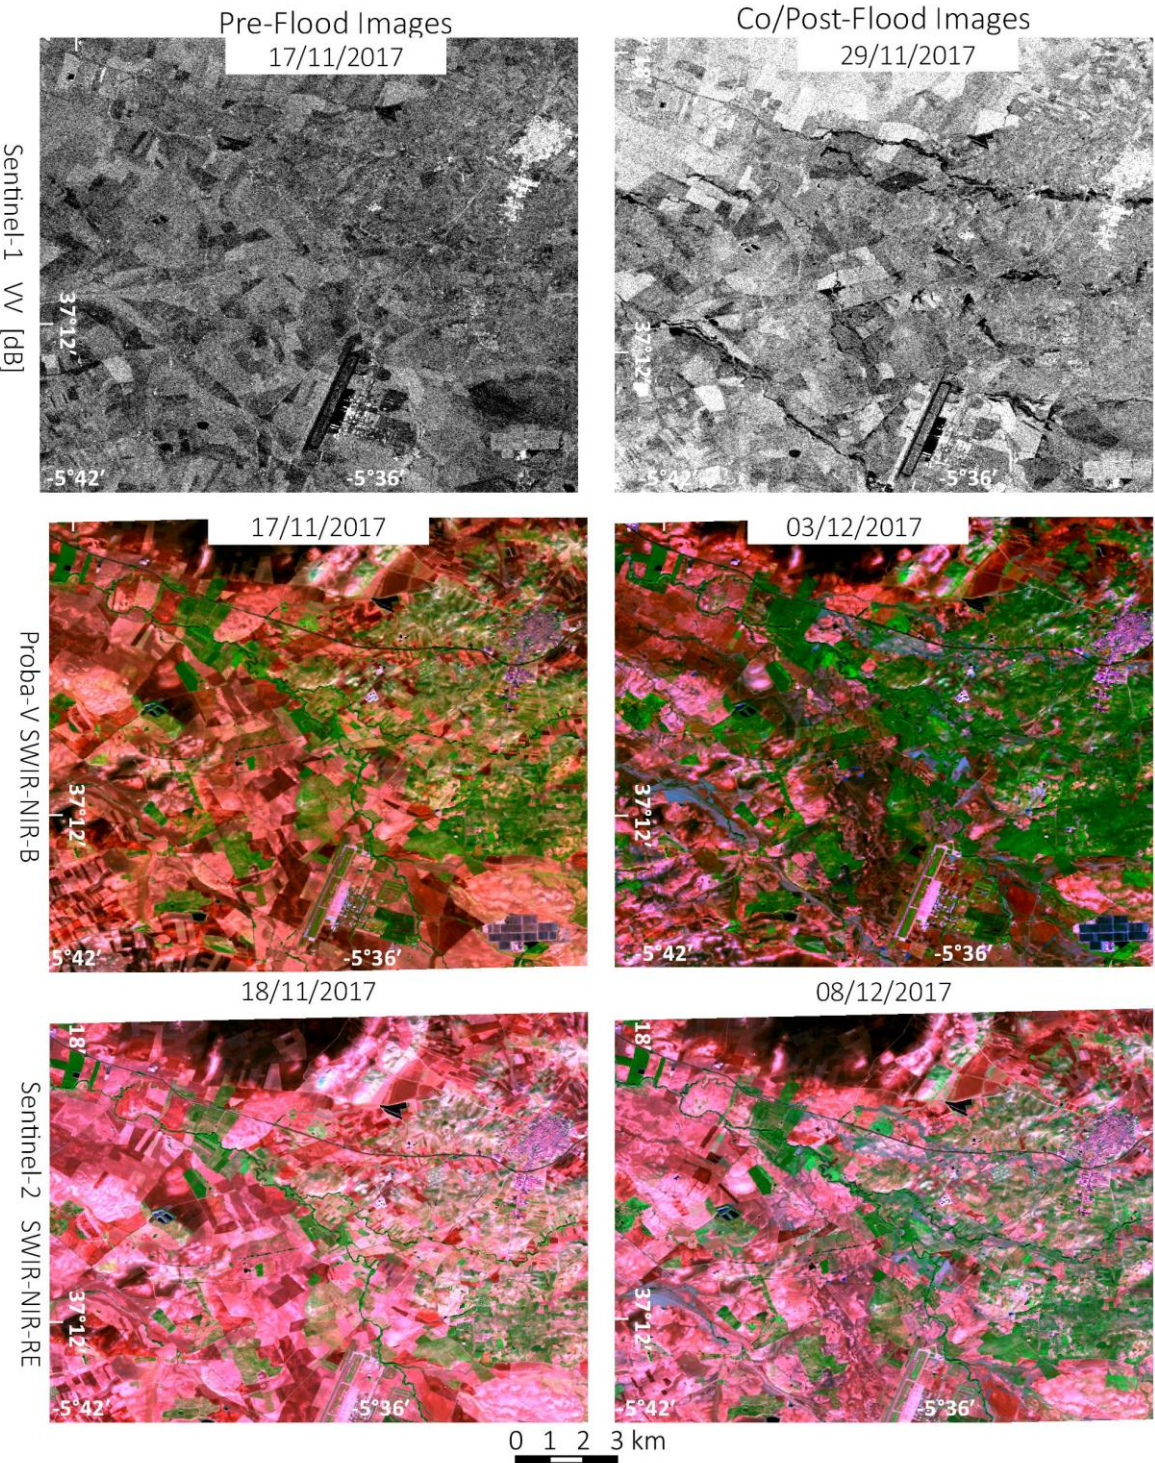

Figure 4. A sampling of satellite images used for Arahall area

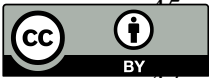

© 2018 by the authors. Submitted for possible open access publication under the terms and conditions of the Creative Commons Attribution (CC BY) license (<http://creativecommons.org/licenses/by/4.0/>).
